# Supplementary material
Source: PubMed Central journal article supplement (PMC6358666)
Supplement: pnas.1814265116.sapp.pdf [file pnas.1814265116.sapp.pdf]

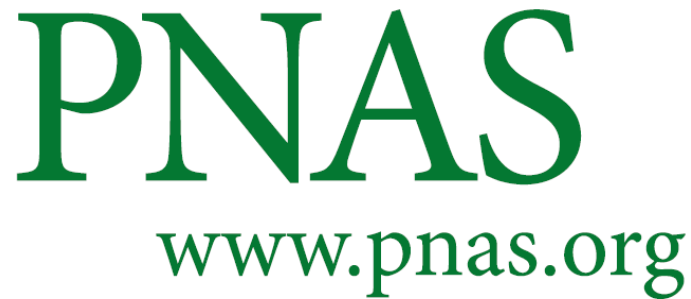

Supplementary Information for:

**Sequential evolution of virulence and resistance during clonal spread of community-acquired methicillin-resistant *Staphylococcus aureus***

Richard Copin, William E. Sause, Yi Fulmer, Divya Balasubramanian, Sophie Dyzenhaus, Jamil M. Ahmed, Krishan Kumar, John Lees, Anna Stachel, Jason C. Fisher, Karl Drlica, Michael Phillips, Jeff Weiser, Paul J. Planet, Anne-Catrin Uhlemann, Deena Altman, Robert Sebra, Harm van Bakel, Jennifer Lighter, Victor J. Torres, Bo Shopsin

Jennifer Lighter, Victor J. Torres, Bo Shopsin

Email: [Bo.Shopsin@nyumc.org](mailto:Bo.Shopsin@nyumc.org); [Victor.Torres@nyumc.org](mailto:Victor.Torres@nyumc.org); [Jennifer.Lighter@nyumc.org](mailto:Jennifer.Lighter@nyumc.org)

**This PDF file includes:**

Figs. S1 to S5  
Tables S1 to S2  
Datasets S1 to S2

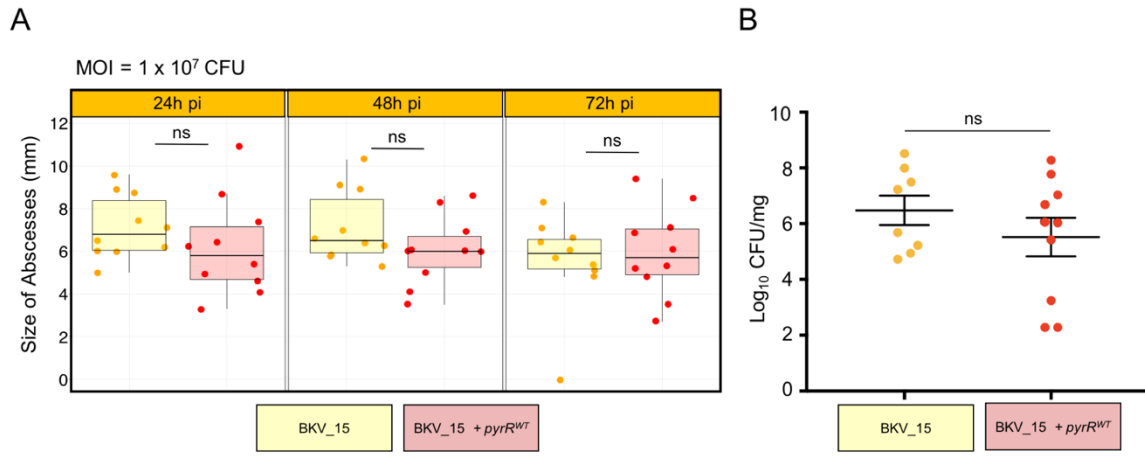

**Fig. S1. Supplementary Figure 1: *pyrR* mutation associated with the USA300-BKV clone does not enhance virulence in a murine skin infection model. USA300-BKV + *pyrR* WT and USA300-BKV-isolate were compared in a murine abscess model of infection. (A) Abscess size at 24h, 48h, and 72h following subcutaneous infection with  $\sim 1 \times 10^7$  CFU of the indicated strain ((n=10) 5 mice/group with two abscesses/mouse). Statistical analyses were performed with a two-tailed unpaired *t* test. (B) Viable counts of the indicated strain of bacteria were enumerated at nine-days post infection. Statistical analyses were performed with a two-tailed unpaired *t* test. BKV: Brooklyn variant; USA300-BKV (BKV\_15; the same strain used in Fig. 2).**

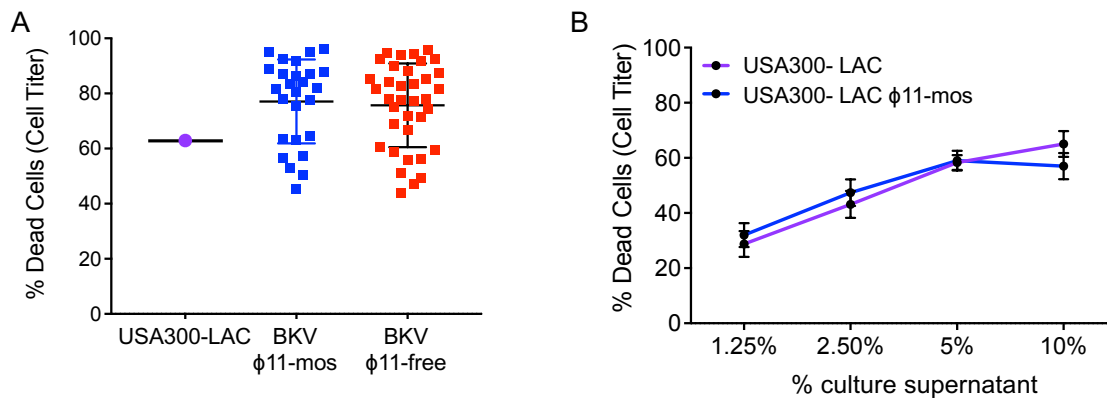

**Fig. S2. Supplementary Figure 2: Mosaic  $\phi$ 11 does not affect cytotoxic killing of neutrophils by *S. aureus*.** (A) Intoxication of primary human neutrophils with 5% culture filtrates from the indicated *S. aureus* strains and controls (USA300 USA300-LAC wild-type and clinical isolates with or without mosaic  $\phi$ 11). Each isolate was tested on PMNs obtained from n=5 donors over 3 individual experiments. Cell viability of PMN cells measured with the metabolic dye CellTiter. (B) Cytotoxicity of USA300-LAC with or without mosaic  $\phi$ 11, as described in A. Symbols: USA300 wild-type (LAC), USA300-LAC + chromosomally inserted mosaic  $\phi$ 11 (USA300-LAC +  $\phi$ 11-mos), and USA300-BKV variants that lack mosaic  $\phi$ 11 ( $\phi$ 11-free).

72h post subcutaneous infection / MOI =  $5 \times 10^7$  CFU

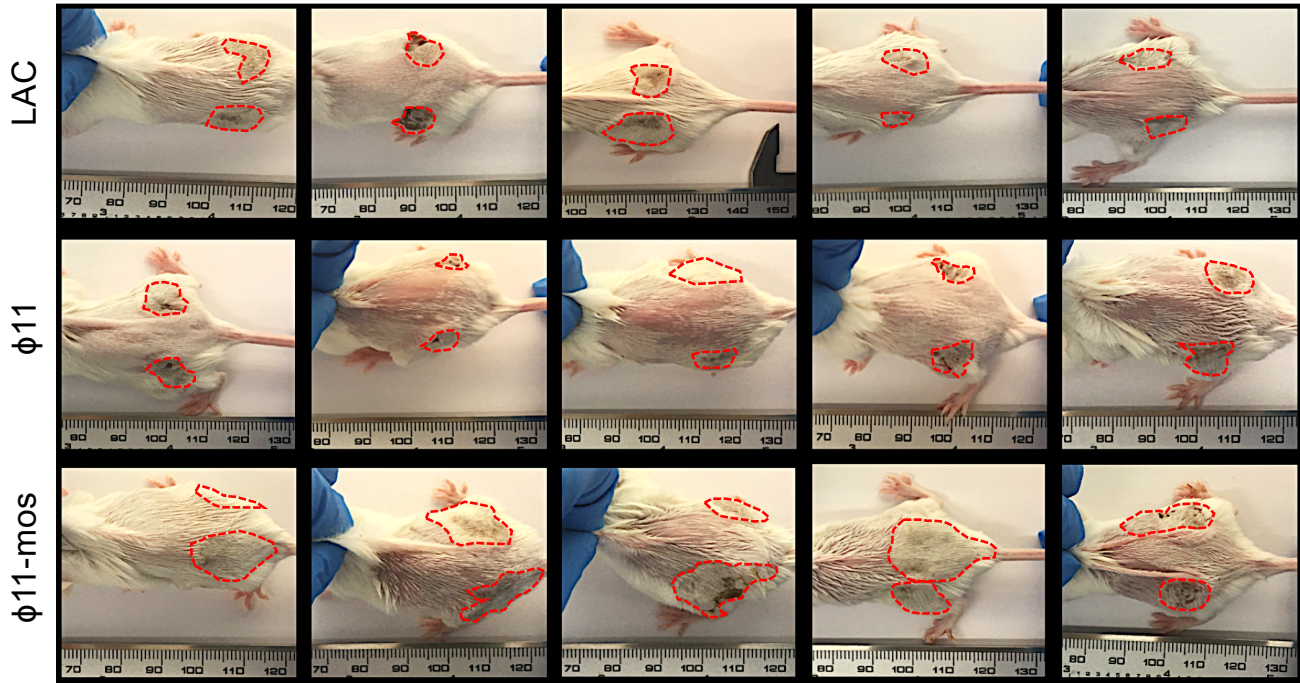

**Fig. S3: Effects of the mosaic portion of  $\phi 11$  are enhanced at high inoculum for lesion size but not dermonecrosis.** Supplementary data to Fig. 4. USA300-LAC lysogens of mosaic  $\phi 11$  (produced by induction of USA300-BKV\_28) and prototypical  $\phi 11$  (produced by induction of RN451) were compared in a murine abscess model of infection. Representative panel of murine skin abscesses at 3-days infection post subcutaneous-infection at  $\sim 5 \times 10^7$  CFU of the indicated strain ((n=15) 5 mice/group with two abscesses/mouse). No difference in the rate of dermonecrosis was noted after daily measurement for 9-days.

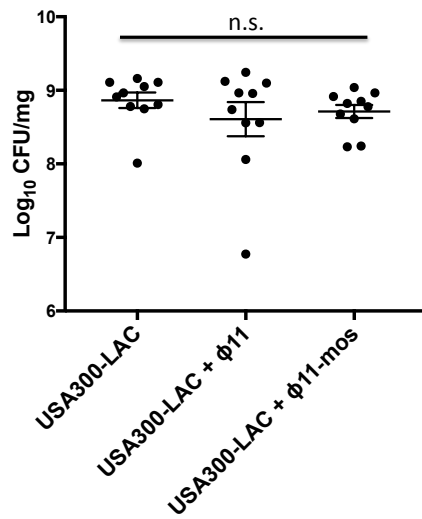

**Fig. S4: The mosaic portion of φ11 does not affect bacterial CFU.** Viable counts of the indicated strain of bacteria from Fig. S3 enumerated at 9-days post subcutaneous-infection with  $\sim 5 \times 10^7$  CFU ((n=15) 5 mice/group with two abscesses/mouse). Statistical analysis was performed using one-way analysis of variance (ANOVA) with *post hoc* Holm-Sidak multiple-comparison test.

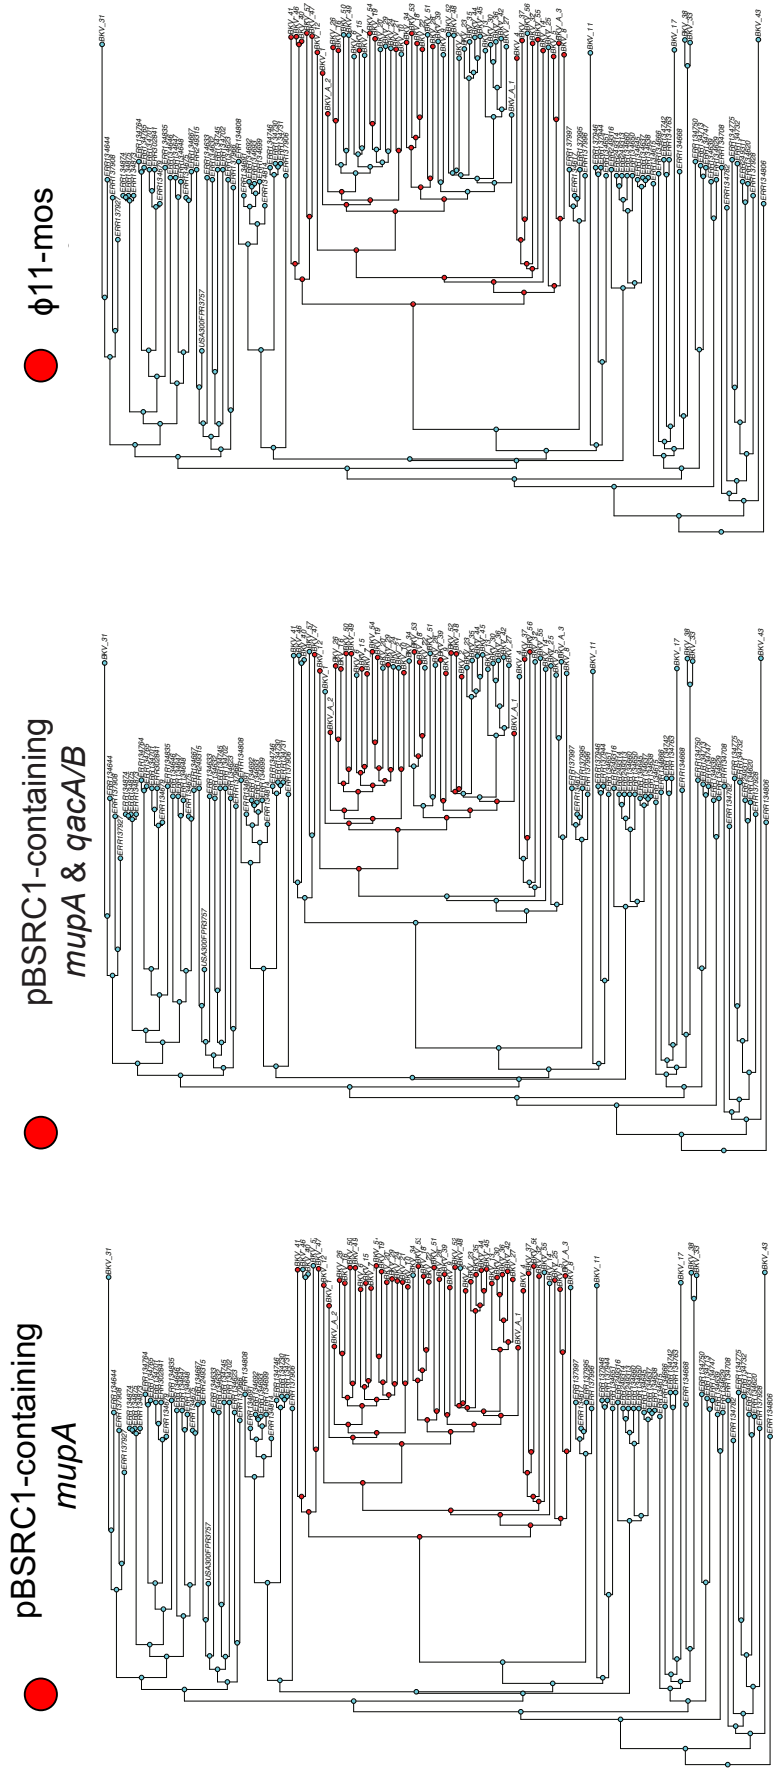

**Fig. S5. Maximum parsimony based ancestral state reconstruction indicating presence or absence of mosaic  $\phi 11$ , mupirocin resistance, and chlorhexidine resistance genes.** Phylogenetic ancestral state reconstruction on the timed trees supports an evolutionary scenario for the diversification of the USA300-BKV clone involving sequential acquisition of mosaic  $\phi 11$ , mupirocin, and finally chlorhexidine resistance. Ancestral state reconstructions were performed using the phangorn R package (version 2.4.0) with the accelerated transformation function; all states and transformations were given equal weight.

**Tables S1 (separate file).** Proportion of *S. aureus* clinically infected\* patients in the pediatric ward during May 1, 2015 - December 31, 2016.

| <i>S. aureus</i> type | High risk ZIP code<br>(n= 895) | Low risk ZIP code<br>(n= 4368) | Infection rate**<br>high risk zip code | Infection rate**<br>low risk zip code | Odd<br>ratio | Coefficient<br>interval | p value |
|-----------------------|--------------------------------|--------------------------------|----------------------------------------|---------------------------------------|--------------|-------------------------|---------|
| MRSA                  | 75 (8.0%)                      | 22 (0.5%)                      | 80.2                                   | 4.9                                   | 15.7         | 7.3, 18.9               | <.0001  |
| MSSA                  | 8 (0.8%)                       | 43 (0.9%)                      | 8.1                                    | 9.3                                   | 8.6          | 0.3, 1.3                | 0.25    |

\*based on positive clinical cultures  
\*\*per 1,000 pediatric patients

Proportion of *S. aureus* clinically colonized patients on admission\* in the pediatric ward during May 1, 2015 - December 31, 2016

| <i>S. aureus</i> type | High risk ZIP code<br>(n= 127) | Low risk ZIP code<br>(n= 324) | Odd<br>ratio | Coefficient<br>interval | p value |
|-----------------------|--------------------------------|-------------------------------|--------------|-------------------------|---------|
| MRSA                  | 10 (7%)                        | 11 (3%)                       | 2.5          | 1.0,6.09                | 0.04    |
| MSSA                  | 29 (19%)                       | 57 (14%)                      | 1.4          | 0.9,2.3                 | 0.15    |

\*based on active surveillance cultures

**Table S2.** Nonsynonymous single-nucleotide polymorphisms common to all isolates of the USA300-BKV clone.

| <i>Gene name</i> | <i>Locus tag</i> | <i>Mutation nature</i> | <i>Annotated function</i>            | <i>Protein family</i> |
|------------------|------------------|------------------------|--------------------------------------|-----------------------|
| pyrR             | SAUSA300_1091    | nSNP                   | Pyrimidine and Amino acid metabolism | Metabolism            |
| aroD             | SAUSA300_0787    | nSNP                   | Amino acid metabolism                | Metabolism            |
| arcB             | SAUSA300_2569    | nSNP                   | Amino acid metabolism                | Metabolism            |
| metK             | SAUSA300_1730    | nSNP                   | Amino acid metabolism                | Metabolism            |
| fadA             | SAUSA300_0225    | nSNP                   | Amino acid metabolism                | Metabolism            |
| licR             | SAUSA300_0333    | nSNP                   | Sugar metabolism                     | Metabolism            |
| melR             | SAUSA300_2326    | nSNP                   | Sugar metabolism                     | Metabolism            |
| glvC             | SAUSA300_2270    | nSNP                   | Sugar metabolism                     | Metabolism            |
| setC             | SAUSA300_0659    | nSNP                   | Sugar metabolism                     | Metabolism            |
| thiD             | SAUSA300_0562    | nSNP                   | Vitamin metabolism                   | Metabolism            |
| cdr              | SAUSA300_0873    | nSNP                   | Disulfide metabolism                 | Metabolism            |
| ddh              | SAUSA300_2463    | nSNP                   | Pyruvate metabolism                  | Metabolism            |
| pyc              | SAUSA300_1014    | nSNP                   | Pyruvate metabolism                  | Metabolism            |
| bltR             | SAUSA300_2445    | nSNP                   | Sugar metabolism                     | Drug efflux           |
| lyrA             | SAUSA300_2282    | nSNP                   | Lysostaphin resistance               | Virulence             |
| spIF             | SAUSA300_1753    | Stop-gain              | Serine protease                      | Virulence             |
| SAUSA300_0773    | SAUSA300_0773    | nSNP                   | Staphylocoagulase                    | Virulence             |
| cap5F            | SAUSA300_0157    | nSNP                   | Capsular biosynthesis protein        | Cell wall             |
| icaB             | SAUSA300_2601    | nSNP                   | intercellular adhesion protein B     | Cell wall             |
| SAUSA300_0090    | SAUSA300_0090    | nSNP                   | Hypothetical protein                 | Hypothetical protein  |
| SAUSA300_0011    | SAUSA300_0011    | nSNP                   | Hypothetical protein                 | Hypothetical protein  |

**Dataset S1 (excel file).** Clinical data and strain characteristics of isolates from high-risk zip code-associated patients and control patients.

**Datset S2 (excel file).** List of nucleotide polymorphisms identify among the 60 high-risk zip code patient isolates.

**Table S3.** Primers

| <b>Name</b> | <b>Sequence (5'-3')</b>    | <b>Reference</b>    |
|-------------|----------------------------|---------------------|
| pyrR-1      | CGCAATAGACATCGACACAGATA    | This study          |
| pyrR-2      | CGATCAACCAAAGCAGCTAAAC     | This study          |
| carA-1      | ACCATATACTACTGCCGAAG       | Kriegestkorte, 2014 |
| carA-2      | CACATTCTACAACCTTCAGGATTACC | Kriegestkorte, 2014 |
| pyrB-1      | ACGTCAACTACCAAACCTTTG      | Kriegestkorte, 2014 |
| pyrB-2      | AACCCTAGCTTAAGTTCTGC       | Kriegestkorte, 2014 |
| VJT278      | TGAGATGTTGGGTAAAGTCCCGCA   | Alonzo, 2012        |
| VJT279      | CGGTTTCGCTGCCCTTGTATTGT    | Alonzo, 2012        |
